# Supplementary material for: Quinoline-Malononitrile-Based Aggregation-Induced Emission Probe for Monoamine Oxidase Detection in Living Cells
Source: MDPI journal article supplement (doi:10.3390/molecules28062655), 2023-03-15
Supplement: s1 [file s1]

## *Supporting Information*

### **Quinoline-Malononitrile-Based Aggregation-Induced Emission Probe for Monoamine Oxidase Detection in Living Cells**

Chuthamat Duangkamol <sup>1,2</sup>, Sirilak Wangngae <sup>1</sup>, Sirawit Wet-osot <sup>3</sup>, Onnicha Khaikate <sup>1</sup>, Kantapat Chansaenpak <sup>4</sup>, Rung-Yi Lai <sup>1,\*</sup> and Anyanee Kamkaew <sup>1,\*</sup>

<sup>1</sup> School of Chemistry, Institute of Science, Suranaree University of Technology,

Nakhon Ratchasima 30000, Thailand

<sup>2</sup> Division of Basic and Medical Sciences, Faculty of Allied Health Sciences, Pathumthani University, Pathum Thani 12000, Thailand

<sup>3</sup> Medical Life Science Institute, Department of Medical Sciences, Ministry of Public Health, Nonthaburi 11000, Thailand; sirawitwetosot@gmail.com

<sup>4</sup> National Nanotechnology Center, National Science and Technology Development Agency, Thailand Science Park, Pathum Thani 12120, Thailand; kantapat.cha@nanotec.or.th

\* Correspondence: rylai@sut.ac.th (R.-Y.L.); anyanee@sut.ac.th (A.K.)

## Experimental Section

### Materials and instruments

All glassware was oven-dried prior to use. All the reagents were purchased from commercial sources (Sigma Aldrich, TCI, Carlo Erba, Acros, and Merck) and used without further purification. Thin layer chromatography (TLC) was performed using silica gel 60 F254 (Merck) and visualized using UV light. Column chromatography was performed with silica gel (mesh 300-400).  $^1\text{H}$  NMR and  $^{13}\text{C}$  NMR spectra were recorded on a Bruker Avance 500 MHz spectrometer at room temperature in  $\text{DMSO-}d_6$  with  $\text{Me}_4\text{Si}$  as an internal standard. Chemical shifts of  $^1\text{H}$  NMR spectra were recorded and reported in ppm from the solvent resonance ( $\text{DMSO-}d_6$  at 2.49 ppm). Data were reported as follows: a chemical shift in ppm ( $\delta$ ), multiplicity (s = singlet, d = doublet, t = triplet, q = quartet, quin = quintet, br = broad, and m = multiplet), coupling constant in hertz (Hz) and integration and only major peaks are reported in  $\text{cm}^{-1}$ .  $^{13}\text{C}$  NMR spectra were also recorded in ppm from the solvent resonance ( $\text{DMSO-}d_6$  at 39.52 ppm). HRMS and mass data were recorded by ESI on a TOF mass spectrometer.

### General spectral analysis for MAO

The stock solutions (1 mM) of probes were prepared in DMSO, which was diluted with hydroxyethyl piperazineethanesulfonic acid (HEPES) buffer (100mM HEPES, pH=7.4 with 5% glycerol and 1% DMSO) to 10  $\mu\text{M}$  for absorbance or fluorescence spectroscopic measurements. The absorbance and fluorescence spectrum changes of the reaction system (HEPES/DMSO = 9:1 v:v, pH = 7.4, 37  $^{\circ}\text{C}$ ) were measured using an ultraviolet analyzer and a fluorometer after the addition of an appropriate volume of MAO (MAO-A or MAO-B) and/or other analytes (excitation wavelength: 445 nm, excitation and emission slit widths: 10 nm). The data are presented with three different measurements' mean standard deviation (SD).

## Synthesis of probe QM-NH<sub>2</sub>

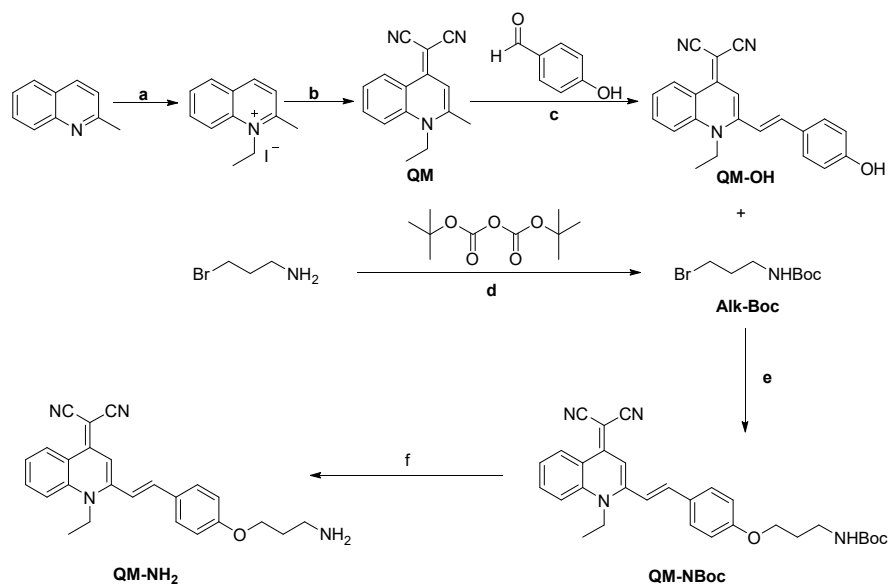

**Scheme S1.** Synthesis of probe **QM-NH<sub>2</sub>**. Reagents and conditions: a) Iodoethane, CH<sub>3</sub>CN, reflux for 12 h; b) Malononitrile, piperidine, Na, EtOH, 0 °C, 4h; c) Piperidine, CH<sub>3</sub>CN, reflux for 1 h; d) Et<sub>3</sub>N, DCM, rt, overnight; e) K<sub>2</sub>CO<sub>3</sub>, DMF, rt, overnight; f) TFA, dry CH<sub>2</sub>Cl<sub>2</sub>, 0 °C, overnight.

**Preparation of QM-OH.** Quinoline-malononitrile (**QM**, 1 g, 4.25 mmol) and 4-hydroxybenzaldehyde (623 mg, 5.11 mmol) were dissolved in 30 mL of acetonitrile with piperidine (1.0 mL) under a nitrogen atmosphere at room temperature. The mixture was then refluxed for 12 h. The crude product was collected by filtration, followed by recrystallization to afford the desired product **QM-OH** (822 mg): yield 57%.<sup>1</sup>

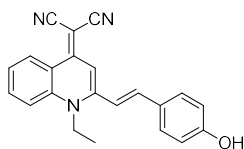

**(*E*)-2-(1-ethyl-2-(4-hydroxystyryl)quinolin-4(1*H*)-ylidene)malononitrile.** Characterization of (**QM-OH**); HRMS:  $m/z$  [M+Na]<sup>+</sup> calc for C<sub>22</sub>H<sub>17</sub>N<sub>3</sub>NaO<sup>+</sup>: 362.1264; found: 362.1264. <sup>1</sup>H NMR (500 MHz, DMSO-*d*<sub>6</sub>) δ 10.07 (s, 1H), 8.99 (d, *J* = 9.0 Hz, 1H), 8.14 (d, *J* = 9.0 Hz, 1H), 7.98 (t, *J* = 7.0 Hz, 1H), 7.74 (d, *J* = 8.5 Hz, 2H), 7.66 (t, *J* = 8.0 Hz, 1H), 7.40 (quartet, *J* = 16.0 Hz, 2H), 7.08 (s, 1H), 6.93 (d, *J* = 9.0 Hz, 2H), 4.64 (quartet, *J* = 7.5 Hz, 2H), 1.50 (t, *J* = 6.5 Hz, 3H), <sup>13</sup>C NMR (125 MHz, DMSO-*d*<sub>6</sub>) δ 159.9, 152.6, 150.0, 140.4, 138.3, 134.0, 130.4, 126.8, 125.7, 125.2, 121.1, 118.4, 117.3, 116.2, 107.0, 47.1, 44.2, 14.1.

**Preparation of QM-NBoc.** A solution of compound **QM-OH** (0.200 g, 0.59 mmol), *t*-Boc-protected primary bromopropylamine (**Alk-Boc**), and K<sub>2</sub>CO<sub>3</sub> (0.122g, 0.89 mmol) in DMF (5mL) was stirred at room temperature for overnight. After the removal of the organic solvent, the product was purified by column chromatography using 60% EtOAc/Hexane as the eluent in a yield of 68%.

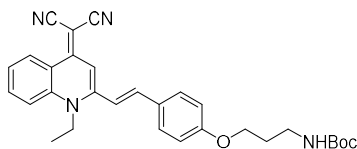

**Tert-butyl (E)-(3-(4-(2-(4-(dicyanomethylene)-1-ethyl-1,4-dihydroquinolin-2-yl)vinyl)phenoxy)propyl)carbamate**, Characterization of **QM-NBoc**; HRMS: *m/z* [M+Na]<sup>+</sup> calc for C<sub>30</sub>H<sub>32</sub>N<sub>4</sub>NaO<sub>3</sub><sup>+</sup>: 519.2366; found: 519.2367. <sup>1</sup>H NMR (500 MHz, DMSO-*d*<sub>6</sub>) δ 9.00 (d, *J* = 8.5 Hz, 1H), 8.16 (d, *J* = 9.0 Hz, 1H), 8.00 (t, *J* = 8.5 Hz, 1H), 7.85 (d, *J* = 9.0 Hz, 2H), 7.69 (t, *J* = 7.5 Hz, 1H), 7.47 (s, 2H), 7.09 (d, *J* = 2.5 Hz, 2H), 7.07 (s, 1H), 4.65 (quartet, *J* = 7.0 Hz, 2H), 4.12 (t, *J* = 6.0 Hz, 2H), 3.17 (quartet, *J* = 6.0 Hz, 2H), 2.58 (s, 9H), 1.93 (quintet, *J* = 6.5 Hz, 2H), 1.48 (t, *J* = 7.0 Hz, 3H), <sup>13</sup>C NMR (125 MHz, DMSO-*d*<sub>6</sub>) δ 160.6, 156.1, 152.7, 150.0, 140.0, 138.3, 134.2, 130.3, 128.3, 125.6, 125.4, 121.1, 118.6, 118.5, 115.3, 107.1, 78.0, 66.0, 47.0, 44.3, 37.4, 29.6, 28.7, 14.1.

**Preparation of QM-NH<sub>2</sub>.** The compound **QM-NBoc** (0.150 g, 0.30 mmol) was added to dry dichloromethane (20 mL) containing 10% (v/v) TFA. The resulting mixture was stirred at 0 °C overnight. After the solvent was removed by evaporation, the product was purified by flash chromatography using 1–5% MeOH/CH<sub>2</sub>Cl<sub>2</sub> as the eluent to give **QM-NH<sub>2</sub>** (0.67 g, 56% yield) as an orange solid.

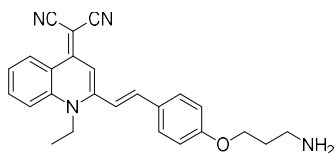

**(E)-2-(2-(4-(3-aminopropoxy)styryl)-1-ethylquinolin-4(1H)-ylidene)malononitrile**,

Characterization of **QM-NH<sub>2</sub>**; HRMS: *m/z* [M+Na]<sup>+</sup> calc for C<sub>25</sub>H<sub>25</sub>N<sub>4</sub>O<sup>+</sup>: 397.1950; found: 397.2023. <sup>1</sup>H NMR (500 MHz, DMSO-*d*<sub>6</sub>) δ 8.99 (d, *J* = 8.5 Hz, 1H), 8.23 (s, 2H), 8.15 (d, *J* = 9.0 Hz, 1H), 7.99 (t, *J* = 7.5 Hz, 1H), 7.85 (d, *J* = 9.0 Hz, 2H), 7.66 (t, *J* = 7.5 Hz, 1H), 7.47 (s, 2H), 7.09 (d, *J* = 8.5 Hz, 2H), 7.08 (s, 1H), 4.64 (quartet, *J* = 7.5 Hz, 2H), 4.20 (t, *J* = 6.0 Hz, 2H), 3.06 (s, 2H), 2.16 (s, 2H), 1.48 (t, *J* = 7.0 Hz, 3H), <sup>13</sup>C NMR (125 MHz, DMSO-*d*<sub>6</sub>) δ 160.2, 152.7, 149.9, 139.9, 138.3, 134.2, 130.3, 128.4, 125.6, 125.4, 121.1, 121.1, 118.8, 118.6, 118.5, 116.4, 115.3, 114.0, 107.1, 65.29, 47.0, 44.3, 36.7, 27.2, 14.1.

# <sup>1</sup>H and <sup>13</sup>C NMR Spectra

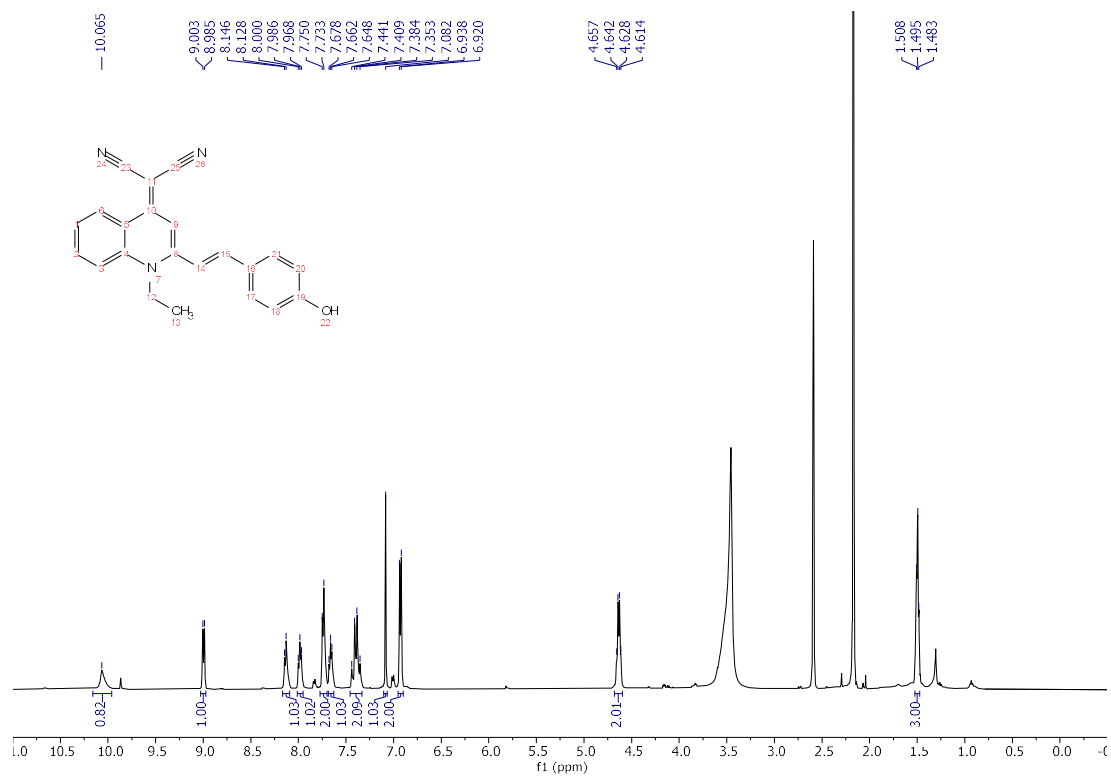

<sup>1</sup>H NMR of compound QM-OH

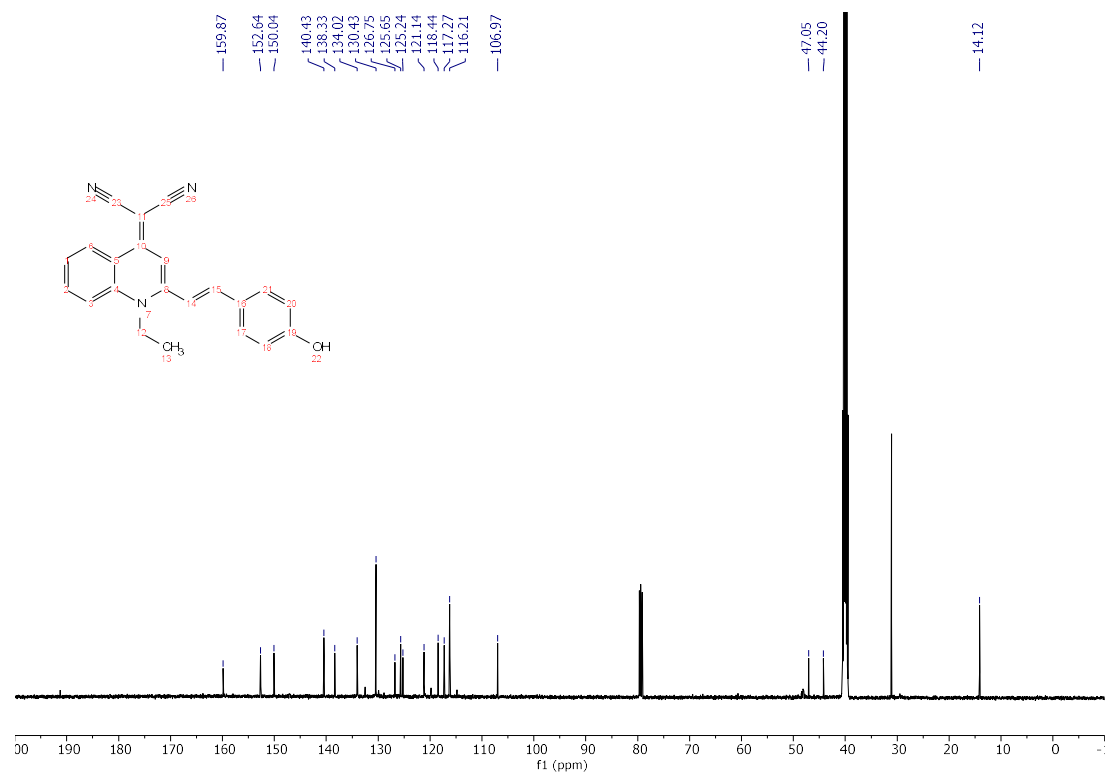

<sup>13</sup>C NMR of compound QM-OH

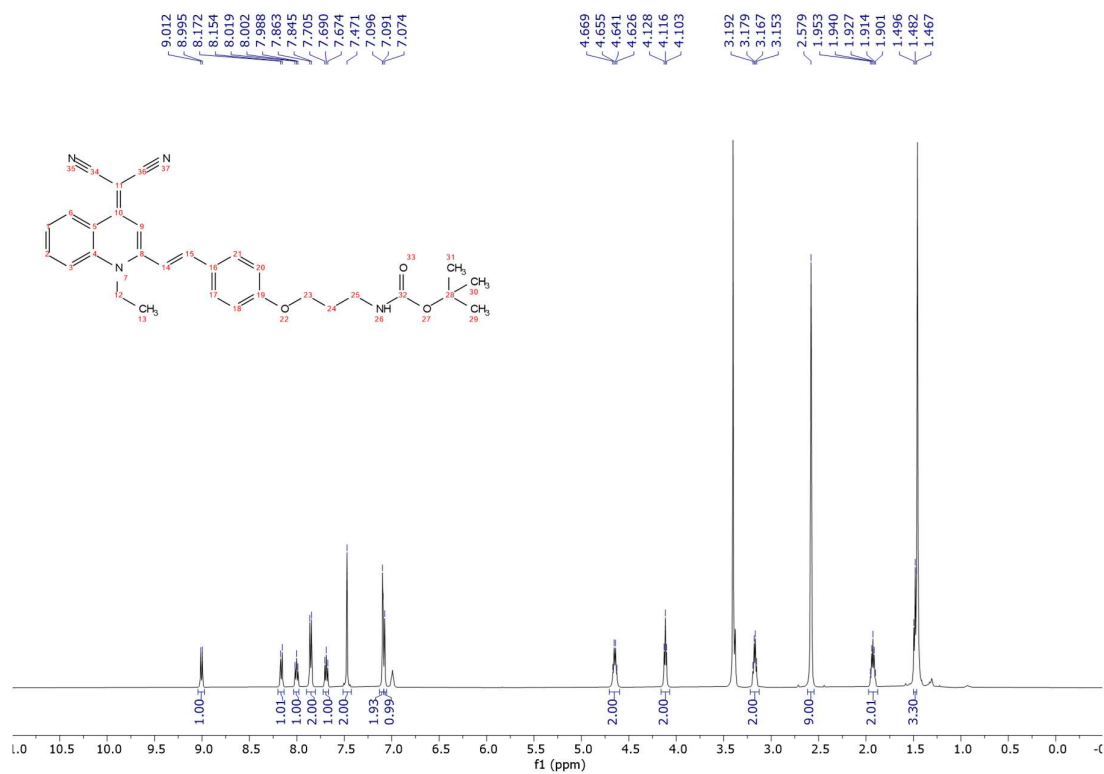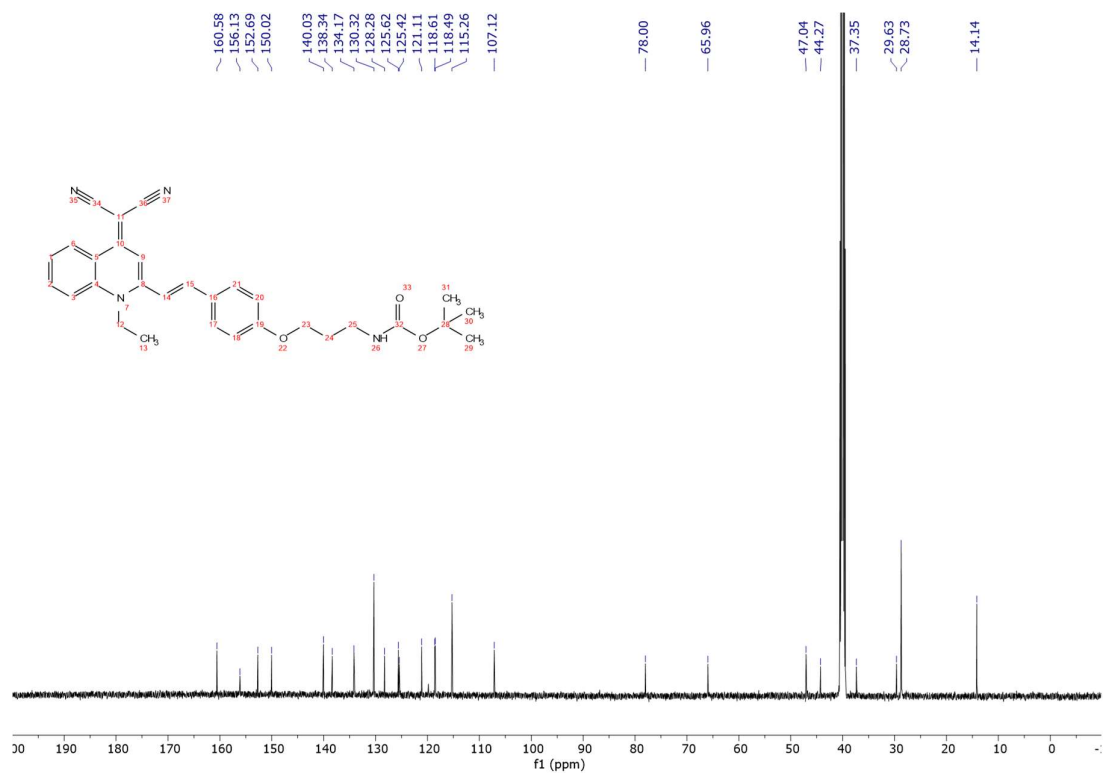

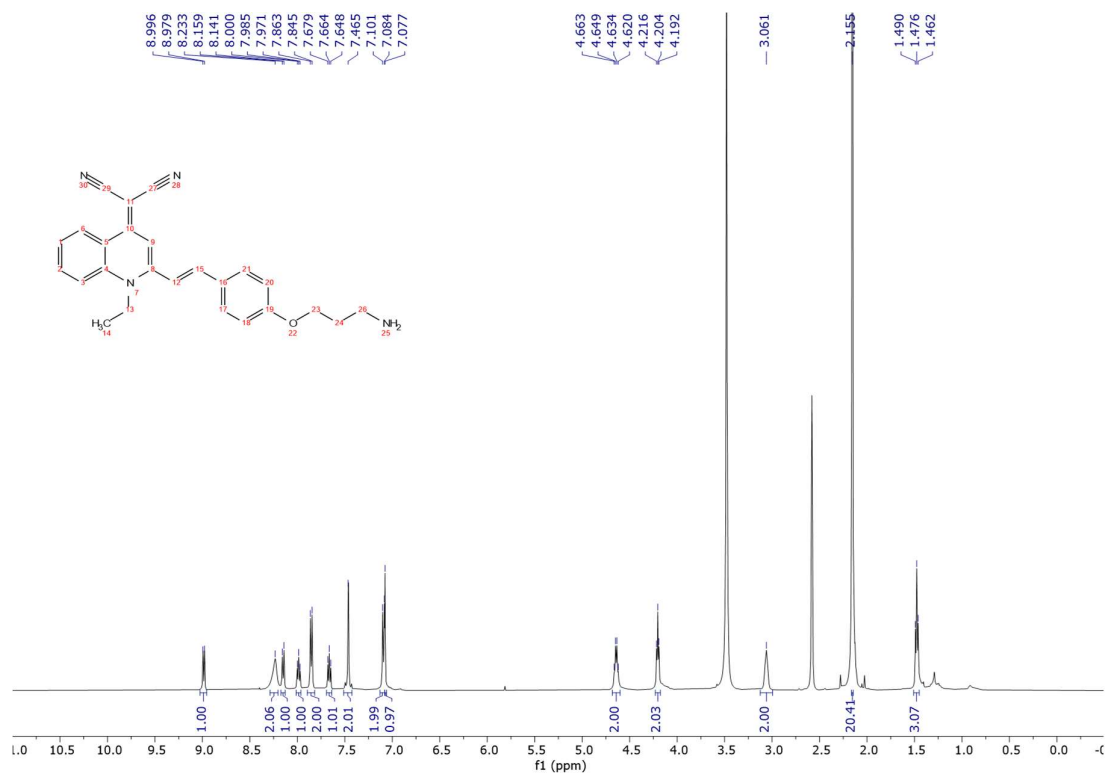

**<sup>1</sup>H NMR of compound QM-NH<sub>2</sub>**

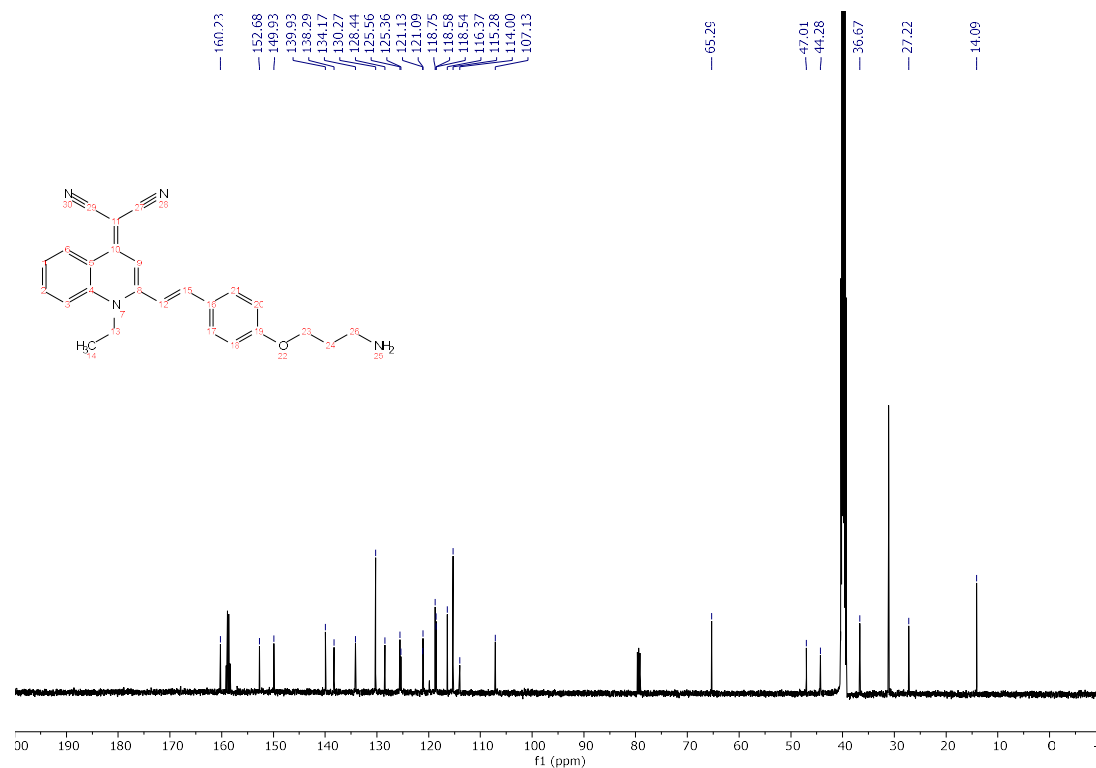

**<sup>13</sup>C NMR of compound QM-NH<sub>2</sub>**

### Compound Spectra

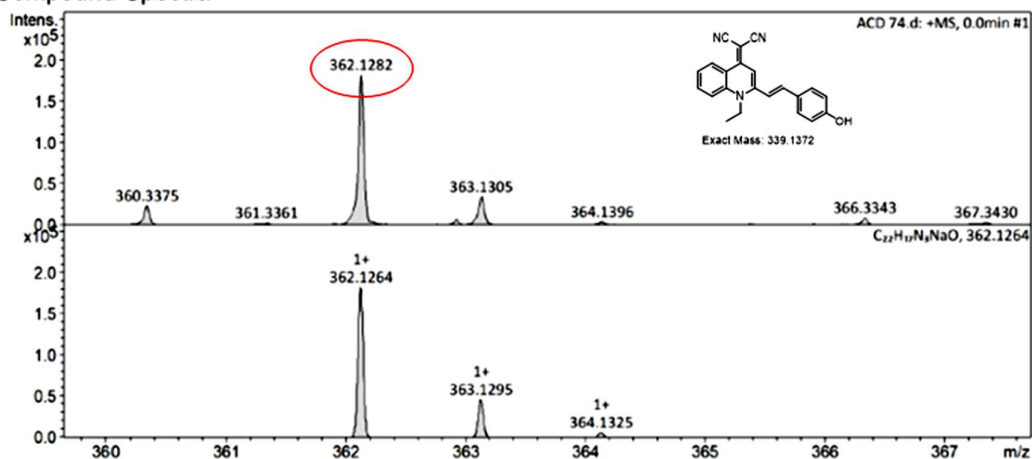

### Compound Spectra

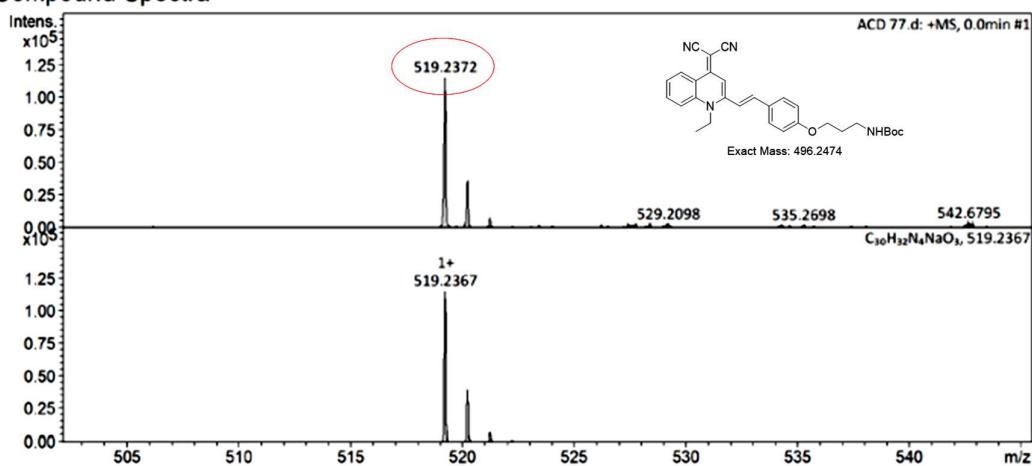

### Compound Spectra

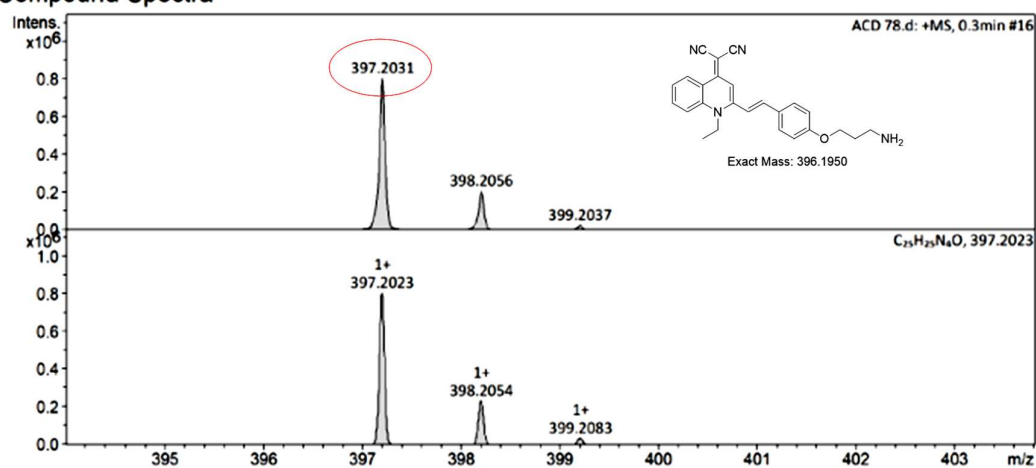

ESI mass spectra of the reaction solutions of probe **QM-R**.



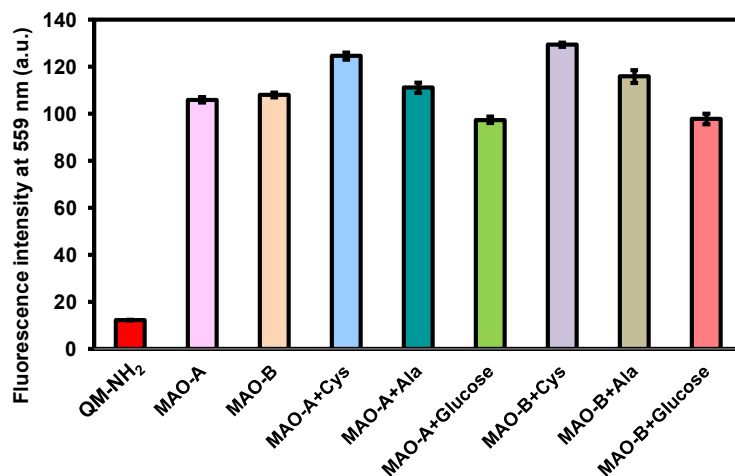

**Figure S1.** Fluorescence response of QM-NH<sub>2</sub> (10  $\mu$ M) after 5 min of incubation at 37  $^{\circ}$ C with MAO-A (20  $\mu$ g/mL) or MAO-B (20  $\mu$ g/mL) in the presence of high concentrations of oxidizable interferences such as amino acids (alanine and cysteine, 1 mM) and glucose (10 mM).

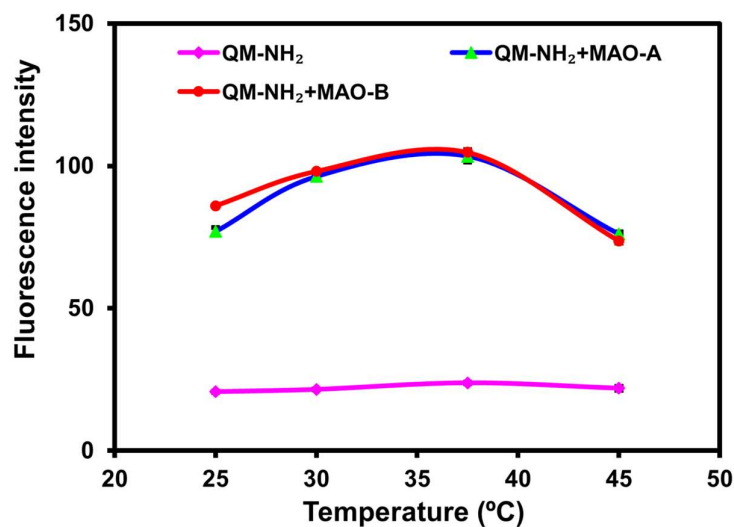

**Figure S2.** Effects of temperature on the fluorescence intensity of QM-NH<sub>2</sub> (pink), QM-OH (blue), QM-NH<sub>2</sub> (10  $\mu$ M) with MAO-A (20  $\mu$ g/mL) (green) and QM-NH<sub>2</sub> (10  $\mu$ M) with MAO-B (20  $\mu$ g/mL) (red) in HEPES buffer pH 7.4, monitored at 559 nm and  $\lambda_{\text{ex}} = 445$  nm. The results are expressed as the mean SD ( $n = 3$ ).

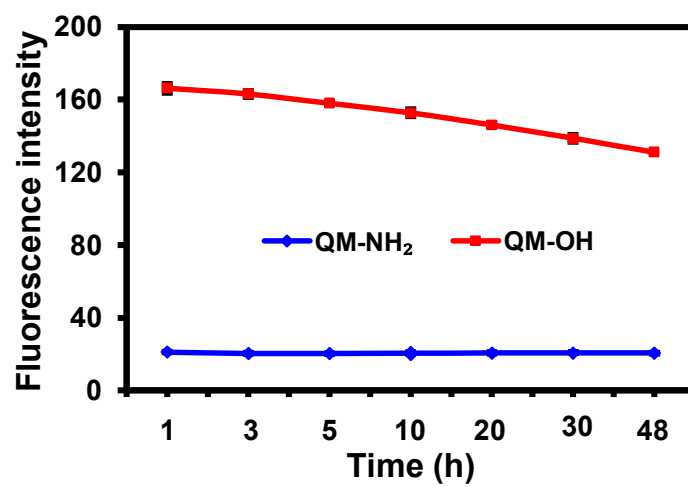

**Figure S3.** Stability of QM-NH<sub>2</sub> and QM-OH (10  $\mu$ M) in HEPES buffer investigated by determining its fluorescence intensity changes, monitored at 559 nm and  $\lambda_{\text{ex}} = 445$  nm. The results are expressed as the mean SD (n = 3).

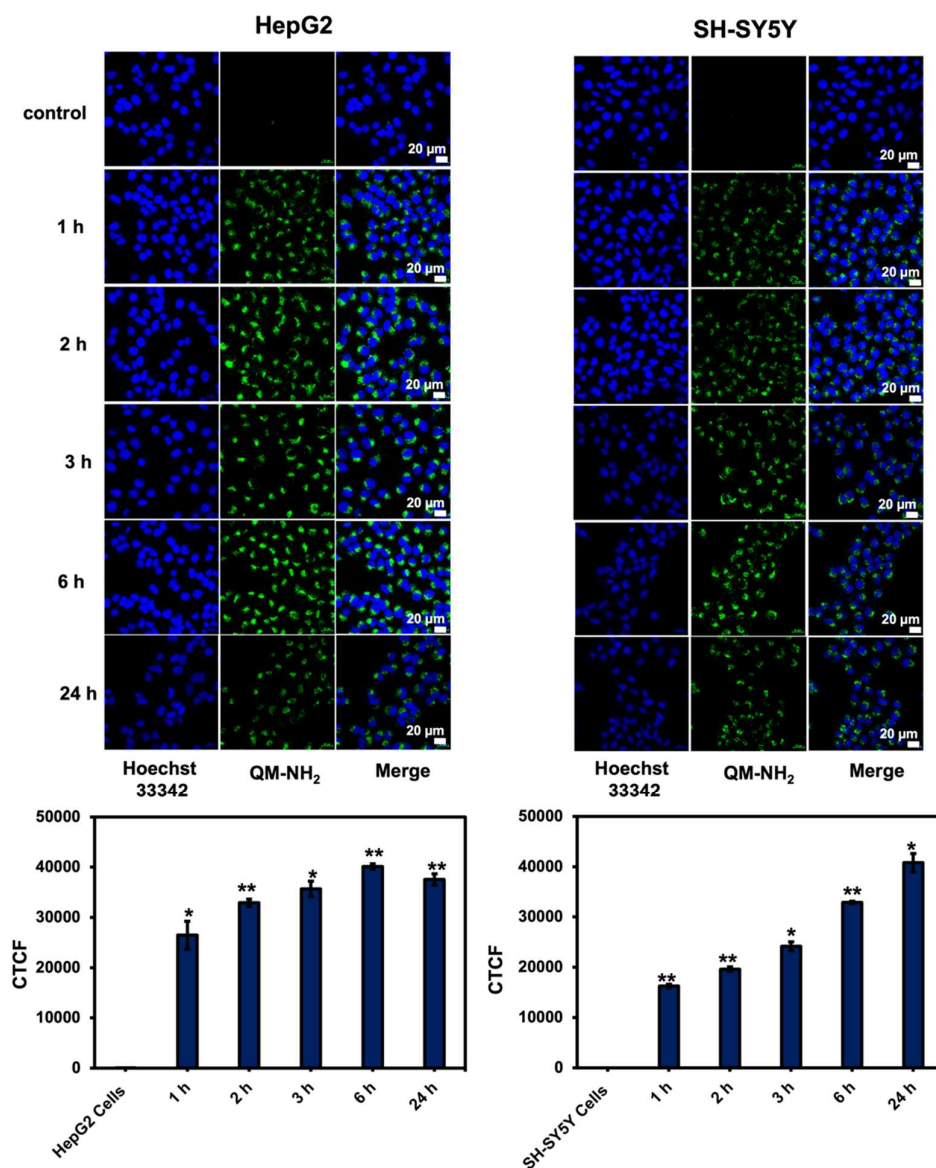

**Figure S4.** Confocal images of SH-SY5Y and HepG2 live cells incubated with 10  $\mu\text{M}$  of **QM-NH<sub>2</sub>** for 1 to 24 h were obtained using a laser scanning confocal microscope (Nikon A1Rsi, 63 $\times$  oil immersed optics) and quantitative fluorescent intensity represented as corrected total cell fluorescence (CTCF), which were quantified using ImageJ and represent the mean  $\pm$  SD (from three independent experiments, 30 cells/set, respectively). Scale bar = 20  $\mu\text{m}$ . Nucleus is shown in blue as Hoechst 33342 signal (excitation laser = 405 nm, emission band 450/25 nm), **QM-OH** can be detected as green fluorescence (excitation laser = 488 nm, emission band 515/30 nm).

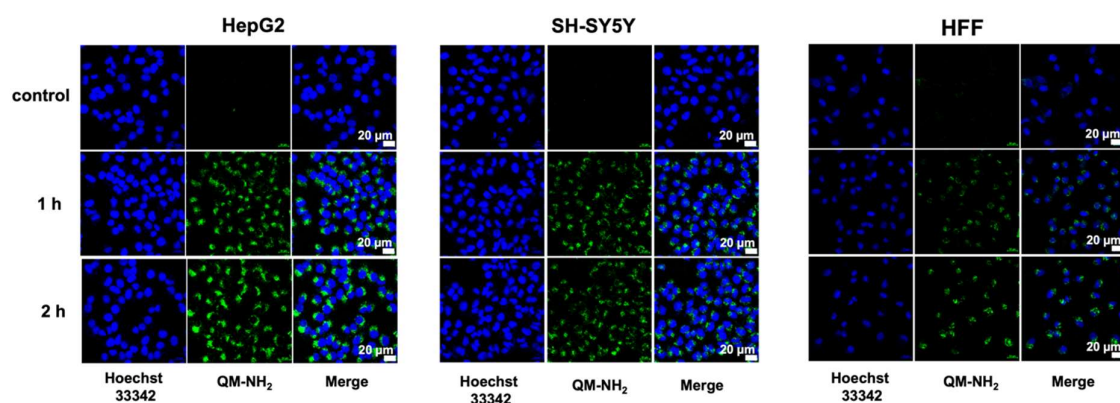

**Figure S5.** Confocal images of SH-SY5Y, HepG2, and HFF cells treated with 10  $\mu\text{M}$  of QM-NH<sub>2</sub> for 1-2 h.

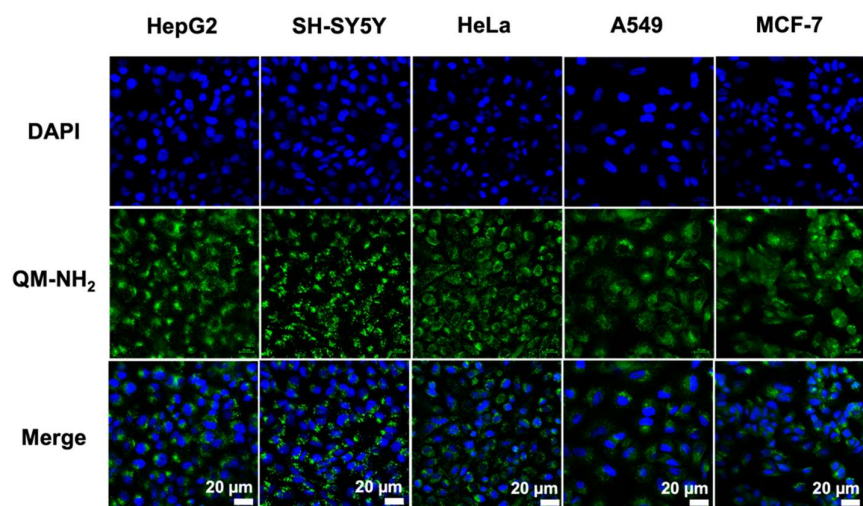

**Figure S6.** Confocal images of various cancer cells treated with 10  $\mu\text{M}$  of QM-NH<sub>2</sub> for 3 h.

**Table S1.** Docking results

| Molecule name      | Binding Energy<br>kcal/mol | No. of<br>H-bond | H-bond interacting<br>residue | Hydrophobic interaction                                                        |
|--------------------|----------------------------|------------------|-------------------------------|--------------------------------------------------------------------------------|
| MAO-A (PDB:2BXR)   |                            |                  |                               |                                                                                |
| QM-NH <sub>2</sub> | -9.66                      | 2                | Asn181, Met324                | Leu97, Phe208, Ile335, Leu337, Tyr407, Tyr444                                  |
| Tyramine           | -4.77                      | 2                | Glu216, Thr336                | Phe208, Ile335, Leu337                                                         |
| MAO-B (PDB:2V5Z)   |                            |                  |                               |                                                                                |
| QM-NH <sub>2</sub> | -12.65                     | 2                | Cys172, Thr201, Tyr326        | Trp119, Leu164, Phe168, Leu171, Ile199, Gln206, Tyr326, Phe343, Tyr398, Tyr435 |
| Tyramine           | -5.40                      | 2                | Cys172, Ile199                | Leu171, Ile199, Tyr326                                                         |

## References

1. Wang, M.; Yang, N.; Guo, Z.; Gu, K.; Shao, A.; Zhu, W.; Xu, Y.; Wang, J.; Prud'homme, R. K.; Guo, X., Facile preparation of AIE-active fluorescent nanoparticles through flash nanoprecipitation. *Industrial & Engineering Chemistry Research* **2015**, *54* (17), 4683-4688.
